# Supplementary material for: A Stochastic Model Correctly Predicts Changes in Budding Yeast Cell Cycle Dynamics upon Periodic Expression of CLN2
Source: PubMed Central journal article supplement (PMC4016136; doi:10.1371/journal.pone.0096726), 2014-05-09
Supplement: pone.0096726.s012.pdf [file pone.0096726.s012.pdf]

**Table S1. Deterministic model variables**

| Variable     | Description                                                                                    |
|--------------|------------------------------------------------------------------------------------------------|
| $V$          | Cell size                                                                                      |
| $[Cln3]$     | Concentration of G1 cyclin Cln3                                                                |
| $[Bck2]$     | Concentration of Bck2, an activator for START transition                                       |
| $[WHI5dep]$  | Concentration of dephosphorylated (active) Whi5                                                |
| $[SBFdep]$   | Concentration of dephosphorylated SBF                                                          |
| $[Cln2]$     | Total concentration of G1 cyclins Cln1,2                                                       |
| $[CKI_T]$    | Total concentration of Sic1+Cdc6 (stoichiometric inhibitors of Clb5,6 and Clb1,2)              |
| $[CKI_P]$    | Concentration of phosphorylated form of Sic1+Cdc6                                              |
| $[Clb5_T]$   | Total concentration of free B cyclins Clb5,6                                                   |
| $[Clb2_T]$   | Total concentration of free B cyclins Clb1,2                                                   |
| $[BUD]$      | Variable for bud emergence progression                                                         |
| $[ORI]$      | Variable for DNA synthesis progression                                                         |
| $[SPN]$      | Variable for spindle assembly progression                                                      |
| $[Swi5_T]$   | Total concentration (number of molecules) of Swi5, transcription factor for CKI synthesis      |
| $[CDC20_T]$  | Total concentration of Cdc20, a protein involved in Clb5,6, Clb1,2 and Pds1 degradation        |
| $[Mad2_A]$   | Concentration of active Mad2, a spindle checkpoint protein that sequesters (inactivates) Cdc20 |
| $[APCP]$     | Concentration of phosphorylated (active) APC, activates Cdc20 by complex formation             |
| $[Cdh1_A]$   | Concentration of active Cdh1 degrading Clb1,2 and Polo kinase                                  |
| $[Net1dep]$  | Concentration of dephosphorylated (active) Net1, a stoichiometric inhibitor of Cdc14           |
| $[PPX]$      | Concentration of phosphatase that dephosphorylates Net1                                        |
| $[Pds1_T]$   | Concentration of securin, Esp1's stoichiometric inhibitor                                      |
| $[Cdc15]$    | Concentration of a kinase, when complexed with Tem1, phosphorylates Net1                       |
| $[Tem1]$     | Concentration of a protein, when complexed with Cdc15, phosphorylates Net1                     |
| $[Polo_T]$   | Total concentration of Polo kinase that activates Tem1                                         |
| $[Polo_A]$   | Concentration of phosphorylated (active) Polo kinase that activates Tem1                       |
| $[UDNA]$     | Set to 1 when $[ORI]=1$ , and set back to 0 when cell divides.                                 |
| $[SPNALIGN]$ | Set to 1 when $[SPN]=1$ , and set back to 0 when cell divides.                                 |
| $[ORIFLAG]$  | Set to 0 when $[ORI]=1$ , and set back to 1 when $[ORI]=0$ .                                   |

Each variable corresponds to a single ODE. Deterministic model variables, which represent the concentration values, are converted to stochastic model variables that represent the numbers of molecules. The conversion process is described in [8,11].
