# Supplementary material for: A Stochastic Model Correctly Predicts Changes in Budding Yeast Cell Cycle Dynamics upon Periodic Expression of CLN2
Source: PubMed Central journal article supplement (PMC4016136; doi:10.1371/journal.pone.0096726), 2014-05-09
Supplement: pone.0096726.s013.pdf [file pone.0096726.s013.pdf]

Table S2. Parameters exclusive to the stochastic model

| Name                       | Initial value | Optimized value | Range of LH sampling | Parameter description                                      |
|----------------------------|---------------|-----------------|----------------------|------------------------------------------------------------|
| $k_{tr1}$                  | 0.22          | 0.3870          | 0.044–1.1            | Translation rate of [Cln3]                                 |
| $k_{dm1}$                  | 0.7           | 2.9459          | 0.14–3.5             | mRNA degradation rate of [Cln3]                            |
| $m_{min1}$                 | 1             | 5               | 0.2–5                | Minimum number of mRNA molecules for [Cln3]                |
| $m_{fluc1}$                | 1             | 1               | -                    | Magnitude of mRNA noise for [Cln3]                         |
| $k_{tr2}$                  | 0.22          | 0.6166          | 0.044–1.1            | Translation rate of [Bck2]                                 |
| $k_{dm2}$                  | 0.7           | 0.6033          | 0.14–3.5             | mRNA degradation rate of [Bck2]                            |
| $m_{min2}$                 | 4             | 17              | 0.8–20               | Minimum number of mRNA molecules for [Bck2]                |
| $m_{fluc2}$                | 1             | 1               | -                    | Magnitude of mRNA noise for [Bck2]                         |
| $k_{tr3}$                  | 0.22          | 0.0761          | 0.044–1.1            | Translation rate of [Cln2]                                 |
| $k_{dm3}$                  | 0.7           | 2.9502          | 0.14–3.5             | mRNA degradation rate of [Cln2]                            |
| $m_{min3}$                 | 1             | 2               | 0.2–5                | Minimum number of mRNA molecules for [Cln2]                |
| $m_{fluc3}$                | 1             | 1               | -                    | Magnitude of mRNA noise for [Cln2]                         |
| $k_{tr4}$                  | 0.22          | 0.2024          | 0.044–1.1            | Translation rate of [CKI <sub>T</sub> ]                    |
| $k_{dm4}$                  | 0.7           | 1.4652          | 0.14–3.5             | mRNA degradation rate of [CKI <sub>T</sub> ]               |
| $m_{min4}$                 | 4             | 1               | 0.8–20               | Minimum number of mRNA molecules for [CKI <sub>T</sub> ]   |
| $m_{fluc4}$                | 1             | 1               | -                    | Magnitude of mRNA noise for [CKI <sub>T</sub> ]            |
| $k_{tr5}$                  | 0.22          | 0.6878          | 0.044–1.1            | Translation rate of [Clb5 <sub>T</sub> ]                   |
| $k_{dm5}$                  | 0.7           | 0.1975          | 0.14–3.5             | mRNA degradation rate of [Clb5 <sub>T</sub> ]              |
| $m_{min5}$                 | 4             | 8               | 0.8–20               | Minimum number of mRNA molecules for [Clb5 <sub>T</sub> ]  |
| $m_{fluc5}$                | 1             | 1               | -                    | Magnitude of mRNA noise for [Clb5 <sub>T</sub> ]           |
| $k_{tr6}$                  | 0.22          | 0.6974          | 0.044–1.1            | Translation rate of [Clb2 <sub>T</sub> ]                   |
| $k_{dm6}$                  | 0.7           | 1.6668          | 0.14–3.5             | mRNA degradation rate of [Clb2 <sub>T</sub> ]              |
| $m_{min6}$                 | 4             | 15              | 0.8–20               | Minimum number of mRNA molecules for [Clb2 <sub>T</sub> ]  |
| $m_{fluc6}$                | 1             | 1               | -                    | Magnitude of mRNA noise for [Clb2 <sub>T</sub> ]           |
| $k_{tr7}$                  | 0.22          | 0.8867          | 0.044–1.1            | Translation rate of [Swi5 <sub>T</sub> ]                   |
| $k_{dm7}$                  | 0.7           | 2.4182          | 0.14–3.5             | mRNA degradation rate of [Swi5 <sub>T</sub> ]              |
| $m_{min7}$                 | 4             | 16              | 0.8–20               | Minimum number of mRNA molecules for [Swi5 <sub>T</sub> ]  |
| $m_{fluc7}$                | 1             | 1               | -                    | Magnitude of mRNA noise for [Swi5 <sub>T</sub> ]           |
| $k_{tr8}$                  | 0.22          | 0.7344          | 0.044–1.1            | Translation rate of [CDC20 <sub>T</sub> ]                  |
| $k_{dm8}$                  | 0.7           | 3.4411          | 0.14–3.5             | mRNA degradation rate of [CDC20 <sub>T</sub> ]             |
| $m_{min8}$                 | 4             | 6               | 0.8–20               | Minimum number of mRNA molecules for [CDC20 <sub>T</sub> ] |
| $m_{fluc8}$                | 1             | 1               | -                    | Magnitude of mRNA noise for [CDC20 <sub>T</sub> ]          |
| $k_{tr9}$                  | 0.22          | 0.6737          | 0.044–1.1            | Translation rate of [Pds1 <sub>T</sub> ]                   |
| $k_{dm9}$                  | 0.7           | 1.2706          | 0.14–3.5             | mRNA degradation rate of [Pds1 <sub>T</sub> ]              |
| $m_{min9}$                 | 4             | 9               | 0.8–20               | Minimum number of mRNA molecules for [Pds1 <sub>T</sub> ]  |
| $m_{fluc9}$                | 1             | 1               | -                    | Magnitude of mRNA noise for [Pds1 <sub>T</sub> ]           |
| $k_{tr10}$                 | 0.22          | 0.4258          | 0.044–1.1            | Translation rate of [Polo <sub>T</sub> ]                   |
| $k_{dm10}$                 | 0.7           | 0.1369          | 0.14–3.5             | mRNA degradation rate of [Polo <sub>T</sub> ]              |
| $m_{min10}$                | 4             | 5               | 0.8–20               | Minimum number of mRNA molecules for [Polo <sub>T</sub> ]  |
| $m_{fluc10}$               | 1             | 1               | -                    | Magnitude of mRNA noise for [Polo <sub>T</sub> ]           |
| $c_{cln3}$                 | 10            | 9.0957          | 5–20                 | Characteristic concentration of Cln3                       |
| $c_{bck2}$                 | 10            | 16.3317         | 5–20                 | Characteristic concentration of Bck2                       |
| $c_{whi5}$                 | 22            | 21.8688         | 11–44                | Characteristic concentration of Whi5                       |
| $c_{sbf}$                  | 22            | 21.8688         | 11–44                | Characteristic concentration of SBF                        |
| $c_{cln2}$                 | 45            | 84.2260         | 22.5–90              | Characteristic concentration of Cln2                       |
| $c_{cki}$                  | 80            | 101.9969        | 40–160               | Characteristic concentration of CKI                        |
| $c_{clb5}$                 | 80            | 101.9969        | 40–160               | Characteristic concentration of Clb5                       |
| $c_{clb2}$                 | 80            | 101.9969        | 40–160               | Characteristic concentration of Clb2                       |
| $c_{swi5}$                 | 57.5          | 50.4561         | 28.75–115            | Characteristic concentration of Swi5                       |
| $c_{cdc20}$ ( $c_{mad2}$ ) | 100           | 93.1338         | 50–200               | Characteristic concentration of Cdc20 (Mad2)               |
| $c_{cdh1}$                 | 100           | 59.4664         | 50–200               | Characteristic concentration of Cdh1                       |
| $c_{apcp}$                 | 100           | 93.1338         | 50–200               | Characteristic concentration of APCP                       |
| $c_{cdc14}$                | 14            | 20.2049         | 7–28                 | Characteristic concentration of Cdc14                      |
| $c_{net1}$                 | 14            | 20.2049         | 7–28                 | Characteristic concentration of Net1                       |
| $c_{ppx}$                  | 100           | 81.0649         | 50–200               | Characteristic concentration of PPX                        |
| $c_{pds1}$                 | 3.3           | 2.3993          | 1.65–6.6             | Characteristic concentration of Pds1                       |
| $c_{espl}$                 | 3.3           | 2.3993          | 1.65–6.6             | Characteristic concentration of Espl                       |
| $c_{cdc15}$                | 8             | 8.7958          | 4–16                 | Characteristic concentration of Cdc15                      |
| $c_{tem1}$                 | 8             | 8.7958          | 4–16                 | Characteristic concentration of Tem1                       |
| $c_{men}$                  | 8             | 8.7958          | 4–16                 | Characteristic concentration of MEN                        |
| $c_{polo}$                 | 100           | 155.2614        | 50–200               | Characteristic concentration of Polo                       |
| $c_{mcm1}$                 | 100           | 183.1687        | 50–200               | Characteristic concentration of Mcm1                       |
| $c_{vol}$                  | 28            | 28              | -                    | Characteristic volume (in femtoliters)                     |
