# Supplementary material for: A Stochastic Model Correctly Predicts Changes in Budding Yeast Cell Cycle Dynamics upon Periodic Expression of CLN2
Source: PubMed Central journal article supplement (PMC4016136; doi:10.1371/journal.pone.0096726), 2014-05-09
Supplement: pone.0096726.s014.pdf [file pone.0096726.s014.pdf]

**Table S3. List of 119 phenotypes**

| Phenotype # | Phenotype name                                                                                 | Viability   | Changes in WT parameters                                                                                                         |
|-------------|------------------------------------------------------------------------------------------------|-------------|----------------------------------------------------------------------------------------------------------------------------------|
| 1           | WT in glucose                                                                                  | Viable      | NONE                                                                                                                             |
| 2           | WT in galactose                                                                                | Viable      | MDT=150; $f = 0.39$ ;                                                                                                            |
| 3           | <i>cln3</i> $\Delta$                                                                           | Viable      | $D_{n3}=0$ ; [CLN3]=0;                                                                                                           |
| 4           | <i>bck2</i> $\Delta$                                                                           | Viable      | $ks_{k2}=0$ ; [BCK2]=0;                                                                                                          |
| 5           | <i>cln3</i> $\Delta$ <i>bck2</i> $\Delta$                                                      | Inviability | $D_{n3}=0$ ; [CLN3]=0; $ks_{k2}=0$ ; [BCK2]=0;                                                                                   |
| 6           | <i>cln3</i> $\Delta$ <i>bck2</i> $\Delta$ multicopy <i>CLN2</i>                                | Inviability | $D_{n3}=0$ ; [CLN3]=0; $ks_{k2}=0$ ; [BCK2]=0;<br>$ks_{n2bf}=ks_{n2bf}^*2$ ;                                                     |
| 7           | <i>cln3</i> $\Delta$ <i>bck2</i> $\Delta$ <i>sic1</i> $\Delta$                                 | Inviability | $D_{n3}=0$ ; [CLN3]=0; $ks_{k2}=0$ ; [BCK2]=0;<br>$ks_{ki}=ks_{ki}^*0.125$ ; $ks_{ki,swi5}=ks_{ki,swi5}^*0.125$ ;<br>[CKIT]=0.2; |
| 8           | <i>cln3</i> $\Delta$ <i>bck2</i> $\Delta$ <i>whi5</i> $\Delta$                                 | Viable      | $D_{n3}=0$ ; [CLN3]=0; $ks_{k2}=0$ ; [BCK2]=0;<br>WHI5T=0; [WHI5A]=0;                                                            |
| 9           | <i>GAL-CLN3</i>                                                                                | Viable      | MDT=150; $f = 0.39$ ; $D_{n3}=D_{n3}^*20$ ;                                                                                      |
| 10          | Multicopy <i>BCK2</i>                                                                          | Viable      | $ks_{k2}=ks_{k2}^*17$ ;                                                                                                          |
| 11          | <i>cln1</i> $\Delta$ <i>cln2</i> $\Delta$                                                      | Viable      | $ks_{n2}=0$ ; $ks_{n2bf}=0$ ; [CLN2]=0;                                                                                          |
| 12          | <i>cln1</i> $\Delta$ <i>cln2</i> $\Delta$ <i>bck2</i> $\Delta$                                 | Viable      | $ks_{n2}=0$ ; $ks_{n2bf}=0$ ; [CLN2]=0;<br>$ks_{k2}=0$ ; [BCK2]=0;                                                               |
| 13          | <i>cln1</i> $\Delta$ <i>cln2</i> $\Delta$ <i>sic1</i> $\Delta$                                 | Viable      | $ks_{n2}=0$ ; $ks_{n2bf}=0$ ; [CLN2]=0;<br>$ks_{ki}=ks_{ki}^*0.125$ ; $ks_{ki,swi5}=ks_{ki,swi5}^*0.125$ ;<br>[CKIT]=0.2;        |
| 14          | <i>cln1</i> $\Delta$ <i>cln2</i> $\Delta$ <i>cki</i> $\Delta$                                  | Viable      | $ks_{n2}=0$ ; $ks_{n2bf}=0$ ; [CLN2]=0;<br>$ks_{ki}=0$ ; $ks_{ki,swi5}=0$ ; [CKIT]=0; [CKIP]=0;                                  |
| 15          | <i>cln1</i> $\Delta$ <i>cln2</i> $\Delta$ <i>GAL-SIC1</i>                                      | Inviability | $ks_{n2}=0$ ; $ks_{n2bf}=0$ ; [CLN2]=0;<br>MDT=150; $f = 0.39$ ; $ks_{ki}=ks_{ki}^*15$ ;                                         |
| 16          | <i>cln1</i> $\Delta$ <i>cln2</i> $\Delta$ <i>GAL-CLN2</i>                                      | Viable      | $ks_{n2bf}=0$ ;<br>MDT=150; $f = 0.39$ ; $ks_{n2}=0.15$ ;                                                                        |
| 17          | <i>cln1</i> $\Delta$ <i>cln2</i> $\Delta$ <i>GAL-SIC1</i> <i>GAL-CLN2</i>                      | Viable      | $ks_{n2bf}=0$ ;<br>MDT=150; $f = 0.39$ ; $ks_{n2}=0.15$ ;<br>$ks_{ki}=ks_{ki}^*15$ ;                                             |
| 18          | <i>cln1</i> $\Delta$ <i>cln2</i> $\Delta$ <i>cdh1</i> $\Delta$                                 | Viable      | $ks_{n2}=0$ ; $ks_{n2bf}=0$ ; [CLN2]=0;<br>CDH1T=0; [CDH1A]=0;                                                                   |
| 19          | <i>cln1</i> $\Delta$ <i>cln2</i> $\Delta$ <i>cdh1</i> $\Delta$ <i>GAL-SIC1</i>                 | Inviability | $ks_{n2}=0$ ; $ks_{n2bf}=0$ ; [CLN2]=0;<br>CDH1T=0; [CDH1A]=0;<br>MDT=150; $f = 0.39$ ; $ks_{ki}=ks_{ki}^*15$ ;                  |
| 20          | <i>cln1</i> $\Delta$ <i>cln2</i> $\Delta$ <i>cdh1</i> $\Delta$ <i>GAL-CLN2</i>                 | Viable      | $ks_{n2bf}=0$ ;<br>CDH1T=0; [CDH1A]=0;<br>MDT=150; $f = 0.39$ ; $ks_{n2}=0.15$ ;                                                 |
| 21          | <i>cln1</i> $\Delta$ <i>cln2</i> $\Delta$ <i>cdh1</i> $\Delta$ <i>GAL-SIC1</i> <i>GAL-CLN2</i> | Viable      | $ks_{n2bf}=0$ ;<br>CDH1T=0; [CDH1A]=0;<br>MDT=150; $f = 0.39$ ; $ks_{n2}=0.15$ ;<br>$ks_{ki}=ks_{ki}^*15$ ;                      |
| 22          | <i>cln1</i> $\Delta$ <i>cln2</i> $\Delta$ <i>cln3</i> $\Delta$                                 | Inviability | $ks_{n2}=0$ ; $ks_{n2bf}=0$ ; [CLN2]=0;<br>$D_{n3}=0$ ; [CLN3]=0;                                                                |
| 23          | <i>cln1</i> $\Delta$ <i>cln2</i> $\Delta$ <i>cln3</i> $\Delta$ <i>GAL-CLN2</i>                 | Viable      | $ks_{n2bf}=0$ ;<br>$D_{n3}=0$ ; [CLN3]=0;                                                                                        |

Continued on next page

Table S3 – Continued from previous page

| Phenotype # | Phenotype name                          | Viability   | Changes in WT parameters                                                                                                                              |
|-------------|-----------------------------------------|-------------|-------------------------------------------------------------------------------------------------------------------------------------------------------|
|             |                                         |             | MDT=150; $f=0.39$ ; $ks_{n2}=0.15$ ;                                                                                                                  |
| 24          | <i>cln1Δ cln2Δ cln3Δ GAL-CLN3</i>       | Viable      | $ks_{n2}=0$ ; $ks_{n2bf}=0$ ; [CLN2]=0;<br>MDT=150; $f=0.39$ ; $D_{n3}=D_{n3} * 20$ ;                                                                 |
| 25          | <i>cln1Δ cln2Δ cln3Δ sic1Δ</i>          | Viable      | $ks_{n2}=0$ ; $ks_{n2bf}=0$ ; [CLN2]=0;<br>$D_{n3}=0$ ; [CLN3]=0;<br>$ks_{ki}=ks_{ki} * 0.125$ ; $ks_{ki,swi5}=ks_{ki,swi5} * 0.125$ ;<br>[CKIT]=0.2; |
| 26          | <i>cln1Δ cln2Δ cln3Δ multicopy BCK2</i> | Viable      | $ks_{n2}=0$ ; $ks_{n2bf}=0$ ; [CLN2]=0;<br>$D_{n3}=0$ ; [CLN3]=0;<br>$ks_{k2}=ks_{k2} * 17$ ;                                                         |
| 27          | <i>cln1Δ cln2Δ cln3Δ bck2Δ GAL-CLN2</i> | Viable      | $ks_{n2bf}=0$ ;<br>$D_{n3}=0$ ; [CLN3]=0;<br>$ks_{k2}=0$ ; [BCK2]=0;<br>MDT=150; $f=0.39$ ; $ks_{n2}=0.15$ ;                                          |
| 28          | <i>cln1Δ cln2Δ cln3Δ multicopy CLB5</i> | Viable      | $ks_{n2}=0$ ; $ks_{n2bf}=0$ ; [CLN2]=0;<br>$D_{n3}=0$ ; [CLN3]=0;<br>$ks_{b5}=ks_{b5} * 5.33$ ; $ks_{b5,bf}=ks_{b5,bf} * 5.33$ ;                      |
| 29          | <i>cln1Δ cln2Δ cln3Δ GAL-CLB5</i>       | Viable      | $ks_{n2}=0$ ; $ks_{n2bf}=0$ ; [CLN2]=0;<br>$D_{n3}=0$ ; [CLN3]=0;<br>MDT=150; $f=0.39$ ; $ks_{b5}=0.029$ ;                                            |
| 30          | <i>cln1Δ cln2Δ cln3Δ GAL-CLB2</i>       | Inviability | $ks_{n2}=0$ ; $ks_{n2bf}=0$ ; [CLN2]=0;<br>$D_{n3}=0$ ; [CLN3]=0;<br>MDT=150; $f=0.39$ ; $ks_{b2}=0.154$ ;                                            |
| 31          | <i>cln1Δ cln2Δ cln3Δ cdh1Δ</i>          | Inviability | $ks_{n2}=0$ ; $ks_{n2bf}=0$ ; [CLN2]=0;<br>$D_{n3}=0$ ; [CLN3]=0;<br>CDH1T=0; [CDH1A]=0;                                                              |
| 32          | <i>cln2Δ cln3Δ apc-ts</i>               | Inviability | $ks_{n2}=0$ ; $ks_{n2bf}=0$ ; [CLN2]=0;<br>$D_{n3}=0$ ; [CLN3]=0;<br>$ks_{20}=0$ ; $ks_{20,m1}=0$ ; CDH1T=0; [CDH1A]=0;                               |
| 33          | <i>cdh1Δ</i>                            | Viable      | CDH1T=0; [CDH1A]=0;                                                                                                                                   |
| 34          | <i>CDH1</i> constitutively active       | Inviability | CDH1T=CDH1T*3; $ki_{h1,e}=0$ ;                                                                                                                        |
| 35          | <i>sic1Δ</i>                            | Viable      | $ks_{ki}=ks_{ki} * 0.125$ ; $ks_{ki,swi5}=ks_{ki,swi5} * 0.125$ ;<br>[CKIT]=0.2;                                                                      |
| 36          | <i>GAL-SIC1</i>                         | Viable      | MDT=150; $f=0.39$ ; $ks_{ki}=ks_{ki} * 15$ ;                                                                                                          |
| 37          | <i>GAL-SIC1-dbΔ</i>                     | Inviability | MDT=150; $f=0.39$ ; $ks_{ki}=ks_{ki} * 15$ ; $kd_{kip}=0$ ;                                                                                           |
| 38          | <i>sic1Δ cdc6Δ (ckiΔ)</i>               | Viable      | $ks_{ki}=0$ ; $ks_{ki,swi5}=0$ ; [CKIT]=0; [CKIP]=0;                                                                                                  |
| 39          | <i>swi5Δ</i>                            | Viable      | $ks_{swi5}=0$ ; $ks_{swi5,m1}=0$ ; [SWI5T]=0;                                                                                                         |
| 40          | <i>sic1Δ cdc6Δ2-49 cdh1Δ</i>            | Inviability | $ks_{ki}=0$ ; $ks_{ki,swi5}=0$ ; [CKIT]=0; [CKIP]=0;<br>CDH1T=0; [CDH1A]=0;                                                                           |
| 41          | <i>swi5Δ cdh1Δ</i>                      | Inviability | $ks_{swi5}=0$ ; $ks_{swi5,m1}=0$ ; [SWI5T]=0;<br>CDH1T=0; [CDH1A]=0;                                                                                  |
| 42          | <i>swi5Δ cdh1Δ GAL-SIC1</i>             | Viable      | $ks_{swi5}=0$ ; $ks_{swi5,m1}=0$ ; [SWI5T]=0;<br>CDH1T=0; [CDH1A]=0;<br>MDT=150; $f=0.39$ ; $ks_{ki}=ks_{ki} * 15$ ;                                  |
| 43          | <i>clb5Δ clb6Δ</i>                      | Viable      | $ks_{b5}=0$ ; $ks_{b5,bf}=0$ ; [CLB5T]=0;                                                                                                             |
| 44          | <i>clb5Δ clb6Δ cln1Δ cln2Δ</i>          | Inviability | $ks_{b5}=0$ ; $ks_{b5,bf}=0$ ; [CLB5T]=0;                                                                                                             |

Continued on next page

Table S3 – Continued from previous page

| Phenotype # | Phenotype name                           | Viability | Changes in WT parameters                                                                                                   |
|-------------|------------------------------------------|-----------|----------------------------------------------------------------------------------------------------------------------------|
|             |                                          |           | $ks_{n2}=0; ks_{n2bf}=0; [CLN2]=0;$                                                                                        |
| 45          | <i>CLB5-dbΔ</i>                          | Viable    | $kd_{b5,20}=0; kd_{b5,20,i}=0;$                                                                                            |
| 46          | <i>CLB5-dbΔ sic1Δ</i>                    | Inviabile | $kd_{b5,20}=0; kd_{b5,20,i}=0;$<br>$ks_{ki}=ks_{ki}*0.125; ks_{ki,swi5}=ks_{ki,swi5}*0.125;$<br>$[CKIT]=0.2;$              |
| 47          | <i>GAL-CLB5</i>                          | Viable    | $MDT=150; f=0.39; ks_{b5}=0.029;$                                                                                          |
| 48          | <i>GAL-CLB5 sic1Δ</i>                    | Inviabile | $MDT=150; f=0.39; ks_{b5}=0.029;$<br>$ks_{ki}=ks_{ki}*0.125; ks_{ki,swi5}=ks_{ki,swi5}*0.125;$<br>$[CKIT]=0.2;$            |
| 49          | <i>GAL-CLB5 cdh1Δ</i>                    | Inviabile | $MDT=150; f=0.39; ks_{b5}=0.029;$<br>$CDH1T=0; [CDH1A]=0;$                                                                 |
| 50          | <i>GAL-CLB5-dbΔ</i>                      | Inviabile | $MDT=150; f=0.39; ks_{b5}=0.029; kd_{b5,20}=0; kd_{b5,20,i}=0;$                                                            |
| 51          | <i>clb1Δ clb2Δ</i>                       | Inviabile | $ks_{b2}=0; ks_{b2,m1}=0; [CLB2T]=0;$                                                                                      |
| 52          | <i>clb1Δ clb2Δ clb5Δ clb6Δ</i>           | Inviabile | $ks_{b2}=0; ks_{b2,m1}=0; [CLB2T]=0;$<br>$ks_{b5}=0; ks_{b5,bf}=0; [CLB5T]=0;$                                             |
| 53          | <i>GAL-CLB2</i>                          | Viable    | $MDT=150; f=0.39; ks_{b2}=0.154;$                                                                                          |
| 54          | Multicopy <i>GAL-CLB2</i>                | Inviabile | $MDT=150; f=0.39; ks_{b2}=ks_{b2}*242.42;$                                                                                 |
| 55          | <i>GAL-CLB2 sic1Δ</i>                    | Inviabile | $MDT=150; f=0.39; ks_{b2}=0.154;$<br>$ks_{ki}=ks_{ki}*0.125; ks_{ki,swi5}=ks_{ki,swi5}*0.125;$<br>$[CKIT]=0.2;$            |
| 56          | <i>GAL-CLB2 cdh1Δ</i>                    | Inviabile | $MDT=150; f=0.39; ks_{b2}=0.154;$<br>$CDH1T=0; [CDH1A]=0;$                                                                 |
| 57          | <i>GAL-CLB2 swi5Δ</i>                    | Inviabile | $MDT=150; f=0.39; ks_{b2}=0.154;$<br>$ks_{swi5}=0; ks_{swi5,m1}=0; [SWI5T]=0;$                                             |
| 58          | <i>CLB2-dbΔ</i>                          | Inviabile | $kd_{b2,20}=0; kd_{b2,h1}=kd_{b2,h1}*0.09; kd_{b2,20,i}=0;$                                                                |
| 59          | <i>CLB2-dbΔ</i> in galactose             | Inviabile | $kd_{b2,20}=0; kd_{b2,h1}=kd_{b2,h1}*0.09; kd_{b2,20,i}=0;$<br>$MDT=150; f=0.39;$                                          |
| 60          | <i>CLB2-dbΔ GAL-SIC1</i>                 | Viable    | $kd_{b2,20}=0; kd_{b2,h1}=kd_{b2,h1}*0.09; kd_{b2,20,i}=0;$<br>$MDT=150; f=0.39; ks_{ki}=ks_{ki}*15;$                      |
| 61          | <i>CLB2-dbΔ</i> multicopy <i>SIC1</i>    | Viable    | $kd_{b2,20}=0; kd_{b2,h1}=kd_{b2,h1}*0.09; kd_{b2,20,i}=0;$<br>$ks_{ki}=ks_{ki}*65; ks_{ki,swi5}=ks_{ki,swi5}*65;$         |
| 62          | <i>CLB2-dbΔ clb5Δ clb6Δ</i>              | Inviabile | $kd_{b2,20}=0; kd_{b2,h1}=kd_{b2,h1}*0.09; kd_{b2,20,i}=0;$<br>$ks_{b5}=0; ks_{b5,bf}=0; [CLB5T]=0;$                       |
| 63          | <i>CLB2-dbΔ clb5Δ clb6Δ</i> in galactose | Viable    | $kd_{b2,20}=0; kd_{b2,h1}=kd_{b2,h1}*0.09; kd_{b2,20,i}=0;$<br>$ks_{b5}=0; ks_{b5,bf}=0; [CLB5T]=0;$<br>$MDT=150; f=0.39;$ |
| 64          | <i>GAL-CLB2-dbΔ</i>                      | Inviabile | $kd_{b2,20}=0; kd_{b2,h1}=kd_{b2,h1}*0.09; kd_{b2,20,i}=0;$<br>$MDT=150; f=0.39; ks_{b2}=0.154;$                           |
| 65          | <i>CLB1 clb2Δ</i>                        | Viable    | $ks_{b2}=ks_{b2}*0.33; ks_{b2,m1}=ks_{b2,m1}*0.33;$                                                                        |
| 66          | <i>CLB1 clb2Δ cdh1Δ</i>                  | Inviabile | $ks_{b2}=ks_{b2}*0.33; ks_{b2,m1}=ks_{b2,m1}*0.33;$<br>$CDH1T=0; [CDH1A]=0;$                                               |
| 67          | <i>CLB1 clb2Δ pds1Δ</i>                  | Inviabile | $ks_{b2}=ks_{b2}*0.33; ks_{b2,m1}=ks_{b2,m1}*0.33;$<br>$ks_{pds}=0; [PDS1T]=0;$                                            |
| 68          | <i>cdc20-ts (cdc20Δ)</i>                 | Inviabile | $ks_{20}=0; ks_{20,m1}=0; [CDC20T]=0; [CDC20A-APCP]=0;$                                                                    |
| 69          | <i>clb5Δ clb6Δ cdc20Δ</i>                | Inviabile | $ks_{b5}=0; ks_{b5,bf}=0; [CLB5T]=0;$<br>$ks_{20}=0; ks_{20,m1}=0; [CDC20T]=0; [CDC20A-APCP]=0;$                           |

Continued on next page

Table S3 – Continued from previous page

| Phenotype # | Phenotype name                            | Viability | Changes in WT parameters                                                                                                                        |
|-------------|-------------------------------------------|-----------|-------------------------------------------------------------------------------------------------------------------------------------------------|
| 70          | <i>cdc20Δ pds1Δ</i>                       | Inviabile | $ks_{20}=0; ks_{20,m1}=0; [CDC20T]=0; [CDC20A-APCP]=0;$<br>$ks_{pds}=0; [PDS1T]=0;$                                                             |
| 71          | <i>clb5Δ clb6Δ cdc20Δ pds1Δ</i>           | Viable    | $ks_{b5}=0; ks_{b5,bf}=0; [CLB5T]=0;$<br>$ks_{20}=0; ks_{20,m1}=0; [CDC20T]=0; [CDC20A-APCP]=0;$<br>$ks_{pds}=0; [PDS1T]=0;$                    |
| 72          | <i>CLB5-dbΔ cdc20Δ pds1Δ</i>              | Inviabile | $kd_{b5,20}=0; kd_{b5,20,i}=0;$<br>$ks_{20}=0; ks_{20,m1}=0; [CDC20T]=0; [CDC20A-APCP]=0;$<br>$ks_{pds}=0; [PDS1T]=0;$                          |
| 73          | <i>CLB5-dbΔ pds1Δ</i>                     | Viable    | $kd_{b5,20}=0; kd_{b5,20,i}=0;$<br>$ks_{pds}=0; [PDS1T]=0;$                                                                                     |
| 74          | <i>GAL-CDC20</i>                          | Inviabile | $MDT=150; f=0.39; ks_{20}=10;$                                                                                                                  |
| 75          | <i>GALL-CDC20 sic1Δ cdh1Δ</i>             | Viable    | $MDT=150; f=0.39; ks_{20}=ks_{20}*1000;$<br>$ks_{ki}=ks_{ki}*0.125; ks_{ki,swi5}=ks_{ki,swi5}*0.125;$<br>$[CKIT]=0.2;$<br>$CDH1T=0; [CDH1A]=0;$ |
| 76          | <i>GALL-CDC20 sic1Δ Cdc6Δ2-49 cdh1Δ</i>   | Viable    | $MDT=150; f=0.39; ks_{20}=ks_{20}*1000;$<br>$ks_{ki}=0; ks_{ki,swi5}=0; [CKIT]=0; [CKIP]=0;$<br>$CDH1T=0; [CDH1A]=0;$                           |
| 77          | <i>APC-A</i>                              | Viable    | $ka_{cp,b2}=0;$                                                                                                                                 |
| 78          | <i>APC-A sic1Δ</i>                        | Viable    | $ka_{cp,b2}=0;$<br>$ks_{ki}=ks_{ki}*0.125; ks_{ki,swi5}=ks_{ki,swi5}*0.125;$<br>$[CKIT]=0.2;$                                                   |
| 79          | <i>APC-A sic1Δ cdc6Δ2-49</i>              | Viable    | $ka_{cp,b2}=0;$<br>$ks_{ki}=0; ks_{ki,swi5}=0; [CKIT]=0; [CKIP]=0;$                                                                             |
| 80          | <i>APC-A cdh1Δ</i>                        | Inviabile | $ka_{cp,b2}=0;$<br>$CDH1T=0; [CDH1A]=0;$                                                                                                        |
| 81          | <i>APC-A cdh1Δ</i> in galactose           | Inviabile | $ka_{cp,b2}=0; CDH1T=0; [CDH1A]=0;$<br>$MDT=150; f=0.39;$                                                                                       |
| 82          | <i>APC-A cdh1Δ GAL-SIC1</i>               | Viable    | $ka_{cp,b2}=0;$<br>$CDH1T=0; [CDH1A]=0;$<br>$MDT=150; f=0.39; ks_{ki}=ks_{ki}*15;$                                                              |
| 83          | <i>APC-A cdh1Δ</i> multicopy <i>SIC1</i>  | Viable    | $ka_{cp,b2}=0;$<br>$CDH1T=0; [CDH1A]=0;$<br>$ks_{ki}=ks_{ki}*65; ks_{ki,swi5}=ks_{ki,swi5}*65;$                                                 |
| 84          | <i>APC-A cdh1Δ</i> multicopy <i>CDC20</i> | Viable    | $ka_{cp,b2}=0;$<br>$CDH1T=0; [CDH1A]=0;$<br>$ks_{20}=ks_{20}*2; ks_{20,m1}=ks_{20,m1}*2;$                                                       |
| 85          | <i>APC-A GAL-CLB2</i>                     | Inviabile | $ka_{cp,b2}=0; MDT=150; f=0.39; ks_{b2}=0.154;$                                                                                                 |
| 86          | <i>pds1Δ</i>                              | Viable    | $ks_{pds}=0; [PDS1T]=0;$                                                                                                                        |
| 87          | <i>PDS1-dbΔ</i>                           | Inviabile | $kd_{pds,20}=0;$                                                                                                                                |
| 88          | <i>GAL-PDS1-dbΔ</i>                       | Inviabile | $MDT=150; f=0.39; ks_{pds}=ks_{pds}*3.33; kd_{pds,20}=0;$                                                                                       |
| 89          | <i>esp1-ts</i>                            | Inviabile | $ESP1T=0;$                                                                                                                                      |
| 90          | <i>GAL-PDS1-dbΔ esp1-ts</i>               | Inviabile | $MDT=150; f=0.39;$<br>$ks_{pds}=ks_{pds}*3.33; kd_{pds,20}=0; ESP1T=0;$                                                                         |
| 91          | <i>GAL-ESP1 cdc20-ts</i>                  | Inviabile | $MDT=150; f=0.39; ESP1T=ESP1T*2;$<br>$ks_{20}=0; ks_{20,m1}=0; [CDC20T]=0; [CDC20A-APCP]=0;$                                                    |

Continued on next page

Table S3 – Continued from previous page

| Phenotype # | Phenotype name                         | Viability   | Changes in WT parameters                                                                    |
|-------------|----------------------------------------|-------------|---------------------------------------------------------------------------------------------|
| 92          | <i>ppxΔ</i>                            | Viable      | PPXT=0; [PPX]=0;                                                                            |
| 93          | <i>GAL-PPX</i>                         | Viable      | MDT=150; $f=0.39$ ; PPXT=PPXT*2;                                                            |
| 94          | <i>tem1Δ</i>                           | Inviability | TEM1T=0; [TEM1]=0;                                                                          |
| 95          | <i>net1-ts</i>                         | Viable      | $kas_{net}=kas_{net}*0.45$ ;                                                                |
| 96          | <i>tem1Δ net1-ts</i>                   | Viable      | TEM1T=0; [TEM1]=0; $kas_{net}=kas_{net}*0.45$ ;                                             |
| 97          | <i>GAL-TEM1</i>                        | Viable      | TEM1T=TEM1T*5;                                                                              |
| 98          | <i>tem1-ts GAL-CDC15</i>               | Viable      | TEM1T=0; [TEM1]=0;<br>MDT=150; $f=0.39$ ; CDC15T=CDC15T*10;                                 |
| 99          | <i>tem1-ts</i> multicopy <i>CDC14</i>  | Viable      | TEM1T=0; [TEM1]=0; CDC14T=CDC14T*2;                                                         |
| 100         | Multicopy <i>CDC15</i>                 | Viable      | CDC15T=CDC15T*20;                                                                           |
| 101         | <i>tem1-ts</i> multicopy <i>CDC15</i>  | Viable      | TEM1T=0; [TEM1]=0; CDC15T=CDC15T*20;                                                        |
| 102         | <i>net1-ts cdc20-ts</i>                | Inviability | $kas_{net}=kas_{net}*0.45$ ;<br>$ks_{20}=0$ ; $ks_{20,m1}=0$ ; [CDC20T]=0; [CDC20A-APCP]=0; |
| 103         | <i>cdc15Δ</i>                          | Inviability | CDC15T=0;                                                                                   |
| 104         | <i>cdc15Δ net1-ts</i>                  | Viable      | CDC15T=0; $kas_{net}=kas_{net}*0.45$ ;                                                      |
| 105         | <i>cdc15Δ net1-ts cdh1Δ</i>            | Viable      | CDC15T=0;<br>$kas_{net}=kas_{net}*0.45$ ; CDH1T=0; [CDH1A]=0;                               |
| 106         | <i>cdc15-ts</i> multicopy <i>TEM1</i>  | Inviability | CDC15T=0; TEM1T=TEM1T*5;                                                                    |
| 107         | <i>cdc15-ts</i> multicopy <i>CDC14</i> | Viable      | CDC15T=0; CDC14T=CDC14T*2;                                                                  |
| 108         | <i>TAB6-1</i>                          | Viable      | $kas_{net}=kas_{net}*0.48$ ;                                                                |
| 109         | <i>cdc15Δ TAB6-1</i>                   | Viable      | CDC15T=0; $kas_{net}=kas_{net}*0.48$ ;                                                      |
| 110         | <i>TAB6-1 clb5Δ clb6Δ</i>              | Inviability | $kas_{net}=kas_{net}*0.48$ ;<br>$ks_{b5}=0$ ; $ks_{b5,bf}=0$ ; [CLB5T]=0;                   |
| 111         | <i>TAB6-1 CLB1 clb2Δ</i>               | Viable      | $kas_{net}=kas_{net}*0.48$ ;<br>$ks_{b2}=ks_{b2}*0.33$ ; $ks_{b2,m1}=ks_{b2,m1}*0.33$ ;     |
| 112         | <i>cdc14-ts</i>                        | Inviability | CDC14T=0;                                                                                   |
| 113         | <i>cdc14-ts sic1Δ</i>                  | Inviability | CDC14T=0;<br>$ks_{ki}=ks_{ki}*0.125$ ; $ks_{ki,swi5}=ks_{ki,swi5}*0.125$ ;<br>[CKIT]=0.2;   |
| 114         | <i>cdc14-ts cdh1Δ</i>                  | Inviability | CDC14T=0; CDH1T=0; [CDH1A]=0;                                                               |
| 115         | <i>cdc14-ts GAL-SIC1</i>               | Inviability | CDC14T=0; MDT=150; $f=0.39$ ;<br>$ks_{ki}=ks_{ki}*15$ ;                                     |
| 116         | <i>cdc14-ts GAL-CLN2</i>               | Inviability | CDC14T=0; MDT=150; $f=0.39$ ;<br>$ks_{n2}=0.15$ ;                                           |
| 117         | <i>GAL-NET1</i>                        | Inviability | MDT=150; $f=0.39$ ;<br>NET1T=NET1T*10.85;                                                   |
| 118         | <i>GAL-CDC14</i>                       | Inviability | MDT=150; $f=0.39$ ;<br>CDC14T=CDC14T*7;                                                     |
| 119         | <i>GAL-NET1 GAL-CDC14</i>              | Viable      | MDT=150; $f=0.39$ ;<br>CDC14T=CDC14T*7; NET1T=NET1T*10.85;                                  |
