# Supplementary material for: A Stochastic Model Correctly Predicts Changes in Budding Yeast Cell Cycle Dynamics upon Periodic Expression of CLN2
Source: PubMed Central journal article supplement (PMC4016136; doi:10.1371/journal.pone.0096726), 2014-05-09
Supplement: pone.0096726.s015.pdf [file pone.0096726.s015.pdf]

**Table S4. Nine phenotypes that are not captured by the deterministic model**

| Phenotype # | Experimental phenotype | Source of mismatch between the model and the experimental phenotype                |
|-------------|------------------------|------------------------------------------------------------------------------------|
| 15          | Inviable               | Viable in the simulations.                                                         |
| 19          | Inviable               | Viable in the simulations.                                                         |
| 38          | Viable                 | Events executed in the correct order, but oscillations have double-period.         |
| 49          | Inviable               | Viable in the simulations.                                                         |
| 66          | Inviable               | Viable in the simulations.                                                         |
| 67          | Inviable               | Viable in the simulations<br>(Esp1 is always active since <i>PDS1</i> is deleted). |
| 78          | Viable                 | Multiple ORI activation events per cycle.                                          |
| 79          | Viable                 | Events executed in the correct order, but oscillations have double-period.         |
| 105         | Viable                 | No events executed after first division                                            |

Mismatches between the deterministic simulations and the experimental phenotypes. In the simulations, double-period oscillations are considered inviable even if the events are executed in the right order.
