# Supplementary material for: A Stochastic Model Correctly Predicts Changes in Budding Yeast Cell Cycle Dynamics upon Periodic Expression of CLN2
Source: PubMed Central journal article supplement (PMC4016136; doi:10.1371/journal.pone.0096726), 2014-05-09
Supplement: pone.0096726.s016.pdf [file pone.0096726.s016.pdf]

**Table S5. Cell cycle events in the deterministic simulations**

| Event # | Event name       | Related species | Event description                                                                             |
|---------|------------------|-----------------|-----------------------------------------------------------------------------------------------|
| 1       | Cell division    | Active Clb2     | $[\text{Clb2}]_k \leq 0.2 \ \& \ [\text{Clb2}]_{k-1} > 0.2$                                   |
| 2 (3)   | ORI relicensing  | ORI             | $[\text{ORI}]_k = 0$                                                                          |
| 3 (2)   | START transition | Active SBF      | $[\text{SBFdep}]_k \geq \text{SBF}_T * 0.5 \ \& \ [\text{SBFdep}]_{k-1} < \text{SBF}_T * 0.5$ |
| 4 (5)   | Bud emergence    | BUD             | $[\text{BUD}]_k \geq 1 \ \& \ [\text{BUD}]_{k-1} < 1$                                         |
| 5 (4)   | ORI activation   | ORI             | $[\text{ORI}]_k \geq 1 \ \& \ [\text{ORI}]_{k-1} < 1$                                         |
| 6       | SPN alignment    | SPN             | $[\text{SPN}]_k \geq 1 \ \& \ [\text{SPN}]_{k-1} < 1$                                         |
| 7       | Esp1 activation  | Active Esp1     | $[\text{Esp1}]_k \geq 0.2 \ \& \ [\text{Esp1}]_{k-1} < 0.2$                                   |

Each event corresponds to a concentration value and its specific threshold. Subscript  $k$  stands for the current time step, whereas  $(k - 1)$  represents the previous time step in the simulations. Events 2 and 3 (also 4 and 5) can interchange order without the loss of viability.
