# Supplementary material for: A Stochastic Model Correctly Predicts Changes in Budding Yeast Cell Cycle Dynamics upon Periodic Expression of CLN2
Source: PubMed Central journal article supplement (PMC4016136; doi:10.1371/journal.pone.0096726), 2014-05-09
Supplement: pone.0096726.s017.pdf [file pone.0096726.s017.pdf]

**Table S6. Parameters that are present both in deterministic and stochastic models**

| Parameter       | Description                     | Parameter        | Description                              |
|-----------------|---------------------------------|------------------|------------------------------------------|
| $\gamma_{Whi5}$ | Time scale for Whi5 activation  | $kd_{swi5}$      | Degradation rate of Swi5                 |
| $\gamma_{ki}$   | CKI inactivation time scale     | $ka_{swi5,14}$   | Swi5 activation by Cdc14                 |
| $\gamma_{cp}$   | APC activation time scale       | $ki_{swi5,b2}$   | Swi5 inactivation by Clb2                |
| $\gamma_{tem}$  | Tem1 activation time scale      | $ka_{m1,b2}$     | Mcm1 activation by Clb2                  |
| $\sigma_{Whi5}$ | Sigmoidicity of Whi5 activation | $ki_{m1}$        | Basal Mcm1 inactivation                  |
| $\sigma_{net}$  | Sigmoidicity of Net1 activation | $ks_{20}$        | Basal Cdc20 synthesis                    |
| $ks_{n3}$       | Cln3 synthesis rate             | $ks_{20,m1}$     | Mcm1-dependent Cdc20 synthesis           |
| $J_{n3}$        | Michaelis-Menten constant       | $kd_{20}$        | Cdc20 degradation                        |
| $D_{n3}$        | Dosage of CLN3 gene             | $ka_{20}$        | Basal Cdc20 activation                   |
| $kd_{n3}$       | Cln3 degradation rate           | $kd_{b5,20,i}$   | Clb5 degradation by Cdc20                |
| $ks_{k2}$       | Bck2 synthesis rate             | $kd_{clb2,20,i}$ | Clb2 degradation by Cdc20                |
| $kd_{k2}$       | Bck2 degradation rate           | $ki_{20,ori}$    | Cdc20 inactivation by spindle checkpoint |
| $kdp_{i5}$      | Basal Whi5 dephosphorylation    | $ka_{cp,b2}$     | APC phosphorylation by Clb2              |
| $kdp_{i5,14}$   | Whi5 dephosphorylation by Cdc14 | $ki_{cp}$        | APC inactivation                         |
| $kp_{i5}$       | Basal Whi5 phosphorylation      | $ka_{h1}$        | Basal Cdh1 activation                    |
| $kp_{i5n3}$     | Whi5 phosphorylation by Cln3    | $ka_{h1,14}$     | Cdh1 activation by Cdc14                 |
| $kp_{i5k2}$     | Whi5 phosphorylation by Bck2    | $ki_{h1}$        | Basal inactivation of Cdh1               |
| $kp_{i5n2}$     | Whi5 phosphorylation by Cln2    | $ki_{h1,e}$      | Cdh1 inactivation rate                   |
| $kp_{i5b5}$     | Whi5 phosphorylation by Clb5    | $e_{h1,n3}$      | Cdh1 inactivation by Cln3                |
| $kdp_{bf}$      | Basal SBF dephosphorylation     | $e_{h1,n2}$      | Cdh1 inactivation by Cln2                |
| $kp_{bf,b2}$    | SBF phosphorylation by Clb2     | $e_{h1,b5}$      | Cdh1 inactivation by Clb5                |
| $ks_{n2}$       | Basal Cln2 synthesis rate       | $e_{h1,b2}$      | Cdh1 inactivation by Clb2                |
| $ks_{n2bf}$     | SBF-dependent Cln2 synthesis    | $kdp_{net}$      | Basal Net1 dephosphorylation             |
| $kd_{n2}$       | Cln2 degradation                | $kdp_{net,14}$   | Net1 dephosphorylation by Cdc14          |
| $ks_{ki}$       | Basal CKI synthesis rate        | $kdp_{net,px}$   | Net1 dephosphorylation by PPX            |
| $ks_{ki,swi5}$  | Swi5-dependent CKI synthesis    | $kp_{net}$       | Basal Net1 phosphorylation               |
| $kd_{ki}$       | Degradation rate of CKI         | $kp_{net,b2}$    | Net1 phosphorylation by Clb2             |
| $kd_{kip}$      | Degradation rate of CKIP        | $kp_{net,en}$    | Net1 phosphorylation by MEN              |
| $kp_{ki,e}$     | CKI phosphorylation rate        | $kp_{net,15}$    | Net1 phosphorylation by Cdc15            |
| $e_{ki,n3}$     | CKI phosphorylation by Cln3     | $ka_{px}$        | Basal PPX activation                     |
| $e_{ki,k2}$     | CKI phosphorylation by Bck2     | $ki_{px}$        | Basal PPX inactivation                   |
| $e_{ki,n2}$     | CKI phosphorylation by Cln2     | $ki_{px,p1}$     | PPX inactivation by Esp1                 |
| $e_{ki,b5}$     | CKI phosphorylation by Clb5     | $ks_{pds}$       | Basal Pds1 synthesis                     |
| $e_{ki,b2}$     | CKI phosphorylation by Clb2     | $kd_{pds}$       | Basal Pds1 degradation                   |
| $kdp_{ki}$      | Basal dephosphorylation of CKI  | $kd_{pds,20}$    | Pds1 degradation by Cdc20A               |
| $kdp_{ki,14}$   | CKI dephosphorylation by Cdc14  | $kd_{pds,20,i}$  | Pds1 degradation by Cdc20                |
| $ks_{b5}$       | Basal Clb5 synthesis            | $ka_{15}$        | Basal Cdc15 activation                   |
| $ks_{b5,bf}$    | SBF-dependent Clb5 synthesis    | $ka_{15,14}$     | Cdc15 activation by Cdc14                |
| $kd_{b5}$       | Basal Clb5 degradation          | $ki_{15}$        | Basal Cdc15 inactivation                 |
| $kd_{b5,20}$    | Clb5 degradation by Cdc20A      | $ki_{15,b2}$     | Cdc15 inactivation by Clb2               |
| $ks_{b2}$       | Basal Clb2 synthesis            | $ka_{tem}$       | Basal Tem1 activation                    |
| $ks_{b2,m1}$    | Mcm1-dependent Clb2 synthesis   | $ka_{tem,lo}$    | Tem1 activation by Polo                  |
| $kd_{b2}$       | Basal Clb2 degradation          | $ka_{tem,p1}$    | Tem1 activation by Esp1                  |
| $kd_{b2,20}$    | Clb2 degradation by Cdc20A      | $ki_{tem}$       | Basal inactivation of Tem1               |

*Continued on next page*

Table S6 – Continued from previous page

| Parameter        | Description                                                                | Parameter        | Description                                       |
|------------------|----------------------------------------------------------------------------|------------------|---------------------------------------------------|
| $kd_{b2,h1}$     | Clb2 degradation by Cdh1A                                                  | $kit_{em,px}$    | Tem1 inactivation by PPX                          |
| $ks_{bud,e}$     | Time scale for BUD synthesis                                               | $ks_{lo}$        | Basal Polo synthesis                              |
| $ebud,n3$        | Cln3 activation of BUD                                                     | $ks_{lo,m1}$     | Mcm1-dependent synthesis of Polo                  |
| $ebud,n2$        | Cln2 activation of BUD                                                     | $kd_{lo}$        | Basal Polo degradation                            |
| $ebud,b5$        | Clb5 activation of BUD                                                     | $kd_{lo,h1}$     | Polo degradation by Cdh1                          |
| $ebud,b2$        | Clb2 activation of BUD                                                     | $ka_{lo}$        | Basal Polo activation                             |
| $kd_{bud}$       | BUD degradation                                                            | $ka_{lo,b2}$     | Polo activation by Clb2                           |
| $ks_{spn}$       | SPN synthesis                                                              | $ki_{lo}$        | Basal Polo inactivation                           |
| $kd_{spn}$       | SPN degradation                                                            | $kas_{net}$      | Efficiency of Cdc14-Net1 complex (RENT) formation |
| $J_{spn}$        | SPN synthesis threshold                                                    | $f$              | Fraction of mass retained by daughter at division |
| $ks_{ori,e}$     | Time scale for ORI synthesis                                               | MDT              | Mass doubling time                                |
| $e_{ori,b5}$     | Clb5 activation of ORI                                                     | $Whi5_T$         | Total Whi5                                        |
| $e_{ori,b2}$     | Clb2 activation of ORI                                                     | $SBF_T$          | Total SBF                                         |
| $kd_{ori}$       | Degradation of ORI                                                         | $Mcm1_T$         | Total Mcm1                                        |
| $ks_{swi5}$      | Basal Swi5 synthesis                                                       | $APC_T$          | Total APC                                         |
| $ks_{swi5,m1}$   | Mcm1-dependent Swi5 synthesis                                              | $Cdh1_T$         | Total Cdh1                                        |
| $\sigma_{SBF}$   | Sigmoidicity of SBF activation                                             | $Net1_T$         | Total Net1                                        |
| $\sigma_{CKI}$   | Sigmoidicity of CKI activation                                             | $Cdc14_T$        | Total Cdc14                                       |
| $\sigma_{Swi5}$  | Sigmoidicity of Swi5 activation                                            | $PPX_T$          | Total PPX                                         |
| $\sigma_{Cdh1}$  | Sigmoidicity of Cdh1 activation                                            | $Esp1_T$         | Total Esp1                                        |
| $\sigma_{Mcm1}$  | Sigmoidicity of Mcm1 activation                                            | $Cdc15_T$        | Total Cdc15                                       |
| $\sigma_{APC}$   | Sigmoidicity of APC activation                                             | $Tem1_T$         | Total Tem1                                        |
| $\sigma_{Mad2}$  | Sigmoidicity of Mad2 activation                                            | $Mad2_T$         | Total Mad2                                        |
| $\sigma_{PPX}$   | Sigmoidicity of PPX activation                                             | $\gamma_{SBF}$   | Time scale for SBF activation                     |
| $\sigma_{Polo}$  | Sigmoidicity of Polo activation                                            | $\gamma_{Cdh1}$  | Time scale for Cdh1 activation                    |
| $\sigma_{Tem1}$  | Sigmoidicity of Tem1 activation                                            | $\gamma_{Mad2}$  | Time scale for Mad2 activation                    |
| $\sigma_{Cdc15}$ | Sigmoidicity of Cdc15 activation                                           | $\gamma_{PPX}$   | Time scale for Cdc15 activation                   |
| $K_{EZ}$         | Cell divides when [Clb2] drops below $K_{EZ}$                              | $\gamma_{Net1}$  | Time scale for Net1 activation                    |
| $K_{EZ2}$        | [ORI] and [SPN] are reset to 0<br>when [Clb2]+[Clb5] drops below $K_{EZ2}$ | $\gamma_{Polo}$  | Time scale for Polo activation                    |
|                  |                                                                            | $\gamma_{Cdc15}$ | Time scale for Cdc15 activation                   |

These parameter values capture 110 phenotypes (out of 119 phenotypes in Table S3) with deterministic simulations. Phenotypes that are listed in Table S4 are not captured.
