# Supplementary material for: A Stochastic Model Correctly Predicts Changes in Budding Yeast Cell Cycle Dynamics upon Periodic Expression of CLN2
Source: PubMed Central journal article supplement (PMC4016136; doi:10.1371/journal.pone.0096726), 2014-05-09
Supplement: pone.0096726.s018.pdf [file pone.0096726.s018.pdf]

**Table S7. Values of parameters that are present both in deterministic and stochastic models**

| Parameter       | Value  | Parameter        | Value  |
|-----------------|--------|------------------|--------|
| $\gamma_{Whi5}$ | 1      | $kd_{swi5}$      | 0.08   |
| $\gamma_{ki}$   | 10     | $ka_{swi5,14}$   | 2      |
| $\gamma_{cp}$   | 0.8    | $ki_{swi5,b2}$   | 8.5    |
| $\gamma_{tem}$  | 0.1    | $ka_{m1,b2}$     | 10     |
| $\sigma_{Whi5}$ | 10     | $ki_{m1}$        | 3      |
| $\sigma_{net}$  | 8      | $ks_{20}$        | 0.006  |
| $ks_{n3}$       | 0.22   | $ks_{20,m1}$     | 0.6    |
| $J_{n3}$        | 6      | $kd_{20}$        | 0.3    |
| $D_{n3}$        | 1      | $ka_{20}$        | 0.4    |
| $kd_{n3}$       | 0.2    | $kd_{b5,20,i}$   | 0.0145 |
| $ks_{k2}$       | 0.0135 | $kd_{clb2,20,i}$ | 0.037  |
| $kd_{k2}$       | 0.25   | $ki_{20, mad}$   | 20     |
| $kdp_{i5}$      | 1      | $ka_{cp,b2}$     | 1.3    |
| $kdp_{i5,14}$   | 0.5    | $ki_{cp}$        | 1      |
| $kp_{i5}$       | 0      | $ka_{h1}$        | 1      |
| $kp_{i5n3}$     | 3      | $ka_{h1,14}$     | 4.3    |
| $kp_{i5k2}$     | 4      | $ki_{h1}$        | 0      |
| $kp_{i5n2}$     | 2      | $ki_{h1,e}$      | 1      |
| $kp_{i5b5}$     | 0      | $e_{h1,n3}$      | 0.25   |
| $kdp_{bf}$      | 1      | $e_{h1,n2}$      | 0.7    |
| $kp_{bfb2}$     | 5      | $e_{h1,b5}$      | 9      |
| $ks_{n2}$       | 0      | $e_{h1,b2}$      | 5.6    |
| $ks_{n2bf}$     | 0.24   | $kdp_{net}$      | 0.1    |
| $kd_{n2}$       | 0.12   | $kdp_{net,14}$   | 0.1    |
| $ks_{ki}$       | 0.0120 | $kdp_{net,px}$   | 3      |
| $ks_{ki,swi5}$  | 0.12   | $kp_{net}$       | 0      |
| $kd_{ki}$       | 0.005  | $kp_{net,b2}$    | 0.25   |
| $kd_{kip}$      | 2.5    | $kp_{net,en}$    | 1      |
| $kp_{ki,e}$     | 1      | $kp_{net,15}$    | 0.03   |
| $e_{ki,n3}$     | 1.05   | $ka_{px}$        | 1      |
| $e_{ki,k2}$     | 0.1    | $ki_{px}$        | 0      |
| $e_{ki,n2}$     | 0.4    | $ki_{px,p1}$     | 3      |
| $e_{ki,b5}$     | 2      | $ks_{pds}$       | 0.03   |
| $e_{ki,b2}$     | 4      | $kd_{pds}$       | 0.05   |
| $kdp_{ki}$      | 1      | $kd_{pds,20}$    | 3      |
| $kdp_{ki,14}$   | 1.8    | $kd_{pds,20,i}$  | 0.3    |
| $ks_{b5}$       | 0.0003 | $ka_{15}$        | 0      |
| $ks_{b5,bf}$    | 0.0145 | $ka_{15,14}$     | 15     |
| $kd_{b5}$       | 0.012  | $ki_{15}$        | 1      |
| $kd_{b5,20}$    | 0.1    | $ki_{15,b2}$     | 0.5    |
| $ks_{b2}$       | 0.0033 | $katem$          | 0      |
| $ks_{b2,m1}$    | 0.022  | $katem,lo$       | 4.25   |
| $kd_{b2}$       | 0.003  | $katem,p1$       | 0      |

*Continued on next page*

Table S7 – *Continued from previous page*

| Parameter        | Value  | Parameter        | Value       |
|------------------|--------|------------------|-------------|
| $kd_{b2,20}$     | 0.14   | $kitem$          | 1           |
| $kd_{b2,h1}$     | 0.6    | $kitem,px$       | 22          |
| $ks_{bud,e}$     | 0.3    | $ks_{lo}$        | 0           |
| $e_{bud,n3}$     | 0.05   | $ks_{lo,m1}$     | 0.03        |
| $e_{bud,n2}$     | 0.5    | $kd_{lo}$        | 0.01        |
| $e_{bud,b5}$     | 0.5    | $kd_{lo,h1}$     | 0.01        |
| $e_{bud,b2}$     | 0      | $ka_{lo}$        | 0           |
| $kd_{bud}$       | 0.01   | $ka_{lo,b2}$     | 10          |
| $ks_{spn}$       | 0.1    | $ki_{lo}$        | 1           |
| $kd_{spn}$       | 0.06   | $kas_{net}$      | 1           |
| $J_{spn}$        | 0.13   | $f$              | 0.42        |
| $ks_{ori,e}$     | 2      | MDT              | 84 (or 100) |
| $e_{ori,b5}$     | 0.4    | $Whi5_T$         | 2.5         |
| $e_{ori,b2}$     | 0.7    | $SBF_T$          | 1           |
| $kd_{ori}$       | 0.06   | $Mcm1_T$         | 1           |
| $ks_{swi5}$      | 0.0050 | $APC_T$          | 25          |
| $ks_{swi5,m1}$   | 0.08   | $Cdh1_T$         | 1           |
| $\sigma_{SBF}$   | 10     | $Net1_T$         | 3.55        |
| $\sigma_{CKI}$   | 10     | $Cdc14_T$        | 2           |
| $\sigma_{Swi5}$  | 10     | $PPX_T$          | 1           |
| $\sigma_{Cdh1}$  | 10     | $Esp1_T$         | 0.5         |
| $\sigma_{Mcm1}$  | 10     | $Cdc15_T$        | 1           |
| $\sigma_{APC}$   | 10     | $Tem1_T$         | 2           |
| $\sigma_{Mad2}$  | 10     | $Mad2_T$         | 25          |
| $\sigma_{PPX}$   | 10     | $\gamma_{SBF}$   | 1           |
| $\sigma_{Polo}$  | 10     | $\gamma_{Cdh1}$  | 1           |
| $\sigma_{Tem1}$  | 10     | $\gamma_{Mad2}$  | 1           |
| $\sigma_{Cdc15}$ | 10     | $\gamma_{PPX}$   | 1           |
| $K_{EZ}$         | 0.2    | $\gamma_{Net1}$  | 1           |
| $K_{EZ2}$        | 0.2    | $\gamma_{Polo}$  | 1           |
|                  |        | $\gamma_{Cdc15}$ | 1           |

In the stochastic simulations, the daughter cell mass retained after each division ( $f$ ) is the remainder of the total mass after the mother fraction is randomly assigned from a normal distribution with 0.58 mean and 0.029 standard deviation.
