# Supplementary material for: A Stochastic Model Correctly Predicts Changes in Budding Yeast Cell Cycle Dynamics upon Periodic Expression of CLN2
Source: PubMed Central journal article supplement (PMC4016136; doi:10.1371/journal.pone.0096726), 2014-05-09
Supplement: pone.0096726.s019.pdf [file pone.0096726.s019.pdf]

**Table S8. Protein abundances**

| Protein | Experiment [15,16]<br>(per haploid cell) | Simulation before<br>parameter optimization | Simulation after<br>parameter optimization |
|---------|------------------------------------------|---------------------------------------------|--------------------------------------------|
| Whi5    | 1440                                     | 1683 $\pm$ 10                               | 1712 $\pm$ 14                              |
| Net1    | 1590                                     | 1521 $\pm$ 9                                | 2246 $\pm$ 18                              |
| Cdc15   | 238                                      | 245 $\pm$ 1                                 | 275 $\pm$ 2                                |
| Tem1    | 573                                      | 490 $\pm$ 3                                 | 551 $\pm$ 4                                |
| Cln3    | 108                                      | 81 $\pm$ 2                                  | 76 $\pm$ 1                                 |
| Cln2    | 1589                                     | 1473 $\pm$ 33                               | 2800 $\pm$ 65                              |
| Clb5    | 438                                      | 964 $\pm$ 15                                | 1239 $\pm$ 25                              |
| Clb2    | 639                                      | 389 $\pm$ 16                                | 516 $\pm$ 25                               |
| CKI     | 768                                      | 532 $\pm$ 16                                | 668 $\pm$ 31                               |

Abundances of some of the key cell cycle proteins: experimental vs. model values. Abundance data is collected in the simulations as described in [8] on page 59. Simulation statistics (mean  $\pm$  standard deviation) are computed from 15 realizations. In each realization, twenty pedigrees are generated independently. Each pedigree of cells is initiated by a single daughter (D) or mother (M) cell. In some cases, experimental abundance data from diploid cells are halved for approximating the abundances in haploid cells.
