# Supplementary material for: A Stochastic Model Correctly Predicts Changes in Budding Yeast Cell Cycle Dynamics upon Periodic Expression of CLN2
Source: PubMed Central journal article supplement (PMC4016136; doi:10.1371/journal.pone.0096726), 2014-05-09
Supplement: pone.0096726.s021.pdf [file pone.0096726.s021.pdf]

**Table S10. Initial condition set**

| Variable              | Value         |
|-----------------------|---------------|
| $V_0$                 | 1.1350        |
| $[\text{Cln3}]_0$     | 0.3115 (54)   |
| $[\text{Bck2}]_0$     | 0.1283 (40)   |
| $[\text{WHI5dep}]_0$  | 1.3762 (575)  |
| $[\text{SBFdep}]_0$   | 0.4945 (206)  |
| $[\text{Cln2}]_0$     | 0.1237 (199)  |
| $[\text{CKI}_T]_0$    | 0.1596 (311)  |
| $[\text{CKI}_P]_0$    | 0 (0)         |
| $[\text{Clb5}_T]_0$   | 0.1848 (360)  |
| $[\text{Clb2}_T]_0$   | 0.1666 (325)  |
| $[\text{BUD}]_0$      | 0.0305        |
| $[\text{ORI}]_0$      | 0.0104        |
| $[\text{SPN}]_0$      | 0.0404        |
| $[\text{Swi5}_T]_0$   | 0.6532 (630)  |
| $[\text{CDC20}_T]_0$  | 1.3909 (2478) |
| $[\text{Mad2}_A]_0$   | 0.4497 (801)  |
| $[\text{APCP}]_0$     | 0.1627 (289)  |
| $[\text{Cdh1}_A]_0$   | 0.9370 (1066) |
| $[\text{Net1dep}]_0$  | 0.1785 (69)   |
| $[\text{PPX}]_0$      | 0.0117 (18)   |
| $[\text{Pds1}_T]_0$   | 0.0252 (1)    |
| $[\text{Cdc15}]_0$    | 0.9756 (164)  |
| $[\text{Tem1}]_0$     | 0.7519 (126)  |
| $[\text{Polo}_T]_0$   | 0.4182 (1242) |
| $[\text{Polo}_A]_0$   | 0.3726 (1106) |
| $[\text{UDNA}]_0$     | 0             |
| $[\text{SPNALIGN}]_0$ | 0             |
| $[\text{ORIFLAG}]_0$  | 1             |

Initial concentration values in the deterministic simulations and the initial numbers of molecules in the stochastic simulations (in parentheses). The conversion of concentrations to numbers of molecules is explained in [8,11]. In *cln3* stochastic simulations, the initial number of Cln3 molecules is set to zero, other values are shown as above. For *MET3-CLN2 cln3* stochastic simulations (with forced *CLN2* expression), the initial numbers of molecules come from the end points of 2000 min *cln3* simulations in order to mimic the experimental conditions in [7].
