# Supplementary material for: A Stochastic Model Correctly Predicts Changes in Budding Yeast Cell Cycle Dynamics upon Periodic Expression of CLN2
Source: PubMed Central journal article supplement (PMC4016136; doi:10.1371/journal.pone.0096726), 2014-05-09
Supplement: pone.0096726.s022.pdf [file pone.0096726.s022.pdf]

**Table S11. Start/end time points (min) of the forced *CLN2* expression pulses**

| With delay? | No              | No            | Yes             | Yes           | No              | No            | Yes             | Yes           | No              | No            | Yes             | Yes           |
|-------------|-----------------|---------------|-----------------|---------------|-----------------|---------------|-----------------|---------------|-----------------|---------------|-----------------|---------------|
| Pulse #     | Start $\tau=90$ | End $\tau=90$ | Start $\tau=90$ | End $\tau=90$ | Start $\tau=78$ | End $\tau=78$ | Start $\tau=78$ | End $\tau=78$ | Start $\tau=69$ | End $\tau=69$ | Start $\tau=69$ | End $\tau=69$ |
| 1           | 0               | 20            | 16.8            | 36.8          | 0               | 20            | 16.8            | 36.8          | 0               | 20            | 16.8            | 36.8          |
| 2           | 90              | 110           | 106.8           | 126.8         | 78              | 98            | 94.8            | 114.8         | 69              | 89            | 85.8            | 105.8         |
| 3           | 180             | 200           | 196.8           | 216.8         | 156             | 176           | 172.8           | 192.8         | 138             | 158           | 154.8           | 174.8         |
| 4           | 270             | 290           | 286.8           | 306.8         | 234             | 254           | 250.8           | 270.8         | 207             | 227           | 223.8           | 243.8         |
| 5           | 360             | 380           | 376.8           | 396.8         | 312             | 332           | 328.8           | 348.8         | 276             | 296           | 292.8           | 312.8         |
| 6           | 450             | 470           | 466.8           | 486.8         | 390             | 410           | 406.8           | 426.8         | 345             | 365           | 361.8           | 381.8         |
| 7           | 540             | 560           | 556.8           | 576.8         | 468             | 488           | 484.8           | 504.8         | 414             | 434           | 430.8           | 450.8         |
| 8           | 630             | 650           | 646.8           | 666.8         | 546             | 566           | 562.8           | 582.8         | 483             | 503           | 499.8           | 519.8         |
| 9           | -               | -             | -               | -             | 624             | 644           | 640.8           | 660.8         | 552             | 572           | 568.8           | 588.8         |
| 10          | -               | -             | -               | -             | -               | -             | -               | -             | 621             | 641           | 637.8           | 657.8         |
| 11          | -               | -             | -               | -             | -               | -             | -               | -             | 690             | 710           | 706.8           | 726.8         |

$\tau$  is the period of forced *CLN2* expression (in minutes). Start and end points of the pulses (in minutes) with *MET3* promoter delay decide the actual time intervals during which *CLN2* expression pulses are administered into the system during the simulations. Start time points without promoter delay are used to compute the time between the closest starting point and budding in the current cycle ( $t_n$ ) and the subsequent cycle ( $t_{n+1}$ ), as it was done in the experimental study [7]. During *cln3* (control) simulations, forced *CLN2* expression is not present. In these simulations,  $t_n$  and  $t_{n+1}$  are computed as the differences between the time points of budding in the current and subsequent cycles with the closest preceding pulse start points without promoter delay, respectively (Figure S2 and Figures 4A and 4C). This procedure was also followed in the experimental study [7]. With or without forced *CLN2* expression, the closest pulse start time that is selected to compute  $t_n$  (or  $t_{n+1}$ ) is before the time point of budding [7] (i.e., start point precedes budding).
