# Supplementary material for: A Stochastic Model Correctly Predicts Changes in Budding Yeast Cell Cycle Dynamics upon Periodic Expression of CLN2
Source: PubMed Central journal article supplement (PMC4016136; doi:10.1371/journal.pone.0096726), 2014-05-09
Supplement: pone.0096726.s023.pdf [file pone.0096726.s023.pdf]

**Table S12. Summary of the statistics regarding the G1 duration bimodality observed in Figures S9 and S10**

| Pulse period ( $\tau$ )                                                                  | 78 min                                                            | 78 min                                                          | 69 min                                                             | 69 min                                                           |
|------------------------------------------------------------------------------------------|-------------------------------------------------------------------|-----------------------------------------------------------------|--------------------------------------------------------------------|------------------------------------------------------------------|
| Description of the cell group                                                            | Small-born daughters with long G1 duration (orange box:Figure S9) | Small-born mothers with long G1 duration (orange box:Figure S9) | Small-born daughters with long G1 duration (orange box:Figure S10) | Small-born mothers with long G1 duration (orange box:Figure S10) |
| # cells in the group                                                                     | 23                                                                | 19                                                              | 349                                                                | 292                                                              |
| # parents of the cells in the group that are mothers (% in green box of Figure S9/S10)   | 2<br>(100%)                                                       | 0<br>-                                                          | 67<br>(69%)                                                        | 21<br>(100%)                                                     |
| # parents of the cells in the group that are daughters (% in green box of Figure S9/S10) | 21<br>(100%)                                                      | 19<br>(100%)                                                    | 282<br>(96%)                                                       | 271<br>(96%)                                                     |
| # of parent cells common to small-born daughters and mothers with long G1 duration       | 17 of 23                                                          | 17 of 19                                                        | 262 of 349                                                         | 262 of 292                                                       |
| # all parents in the pedigree that are mothers                                           | 2305                                                              |                                                                 | 2853                                                               |                                                                  |
| # all parents in the pedigree that are daughters                                         | 1933                                                              |                                                                 | 2468                                                               |                                                                  |
| Average budded period length among parents of cells in the group                         | 75.22 min<br>(std=6.96 min)                                       | 77.99 min<br>(std=4.20 min)                                     | 70.81 min<br>(std=6.80 min)                                        | 72.54 min<br>(std=6.01 min)                                      |
| Average budded period length of all parent cells in the pedigree that are daughters      | 48.93 min<br>(std=8.69 min)                                       |                                                                 | 58.45 min<br>(std=10.82 min)                                       |                                                                  |
| Average budded period length of all parent cells in the pedigree that are mothers        | 45.69 min<br>(std=4.60 min)                                       |                                                                 | 50.18 min<br>(std=6.53 min)                                        |                                                                  |

Statistics of the small-born cells exhibiting bimodality of the G1 duration with 78 and 69 min periods of forced *CLN2* expression.
